# Supplementary material for: Biochemical and genetic analysis of the role of the viral polymerase in enterovirus recombination
Source: PubMed Central journal article supplement (PMC5001610; doi:10.1093/nar/gkw567), 2016-06-17
Supplement: supp_gkw567_nar-01016-v-2016-File011.pdf [file supp_gkw567_nar-01016-v-2016-File011.pdf]

*Supplementary Figure S1 – the addition of a functional synthetic CRE to the 3'NCR*

RNA structure of the modified 3' NCR predicted by MFOLD

(<http://unafold.rna.albany.edu/?q=mfold/RNA-Folding-Form>) and redrawn for clarity.

Numbering indicates the poliovirus type 1 reference sequence (Genbank Accession Number V01149.1). The sequence highlighted in red corresponds to Synth2, a partially-synthetic CRE previously published (21) engineered into a *Bss* HII site inserted immediately after the termination codon of the poliovirus polyprotein (underlined).

*Supplementary Figure S2 – competition assays between unmodified type 1 poliovirus and a genome with the CRE relocated 3'NCR (FLC $\Delta$ CRE\_3'CRE)*

The 8 mutations that inactivate CRE function (defined as the SL3 substitutions)(13) introduce a *Swa* I site to the genome. An RT-PCR product spanning the region of the 2C coding region encompassing the CRE was amplified from wild-type (FLC) poliovirus type 1 and from a virus in which the native CRE had been inactivated and a synthetic derivative inserted into the 3'NCR (FLC $\Delta$ CRE\_3'CRE), cut with *Swa* I and the products run on an agarose gel before ethidium bromide staining. The FLC product is uncut and the FLC $\Delta$ CRE\_3'CRE product cut into two pieces. The two viruses were mixed in 1:1, 10:1 or 1:10 ratios and the mix used to infect HeLa cells at an moi of 1. The virus-containing cell supernatant was passaged a further 5 times on HeLa cells, the RNA extracted from the first and last passage and used as template for the amplification of a product spanning the location of the native CRE. Over the course of the five passages neither virus predominates indicating that FLC $\Delta$ CRE\_3'CRE and unmodified poliovirus type 1 are broadly equivalent in replication fitness.

*Supplementary Figure S3 – products of the extended 3'CRE-REP assay*

Schematic diagram indicating the location of template switching from clonal recombinant isolates obtained for the 3'CRE-REP assay. Recombinants were recovered following co-transfection of murine L929 cells with RNA generated *in vitro* from pT7/SL3 (upper 'acceptor' genome) and pRLuc $\Delta$ \_3'CRE (lower 'donor' genome). The junction sequences of imprecise recombinants are indicated with solid lines, these contained in-frame duplications. Dashed lines indicate precise recombination products in which there are no duplicated sequences.

*Supplementary Figure S4 – recombination of G64S templates in the CRE-REP assay is enhanced in the presence of ribavirin*

Inter- or intratypic CRE-REP assays were primed with donor and acceptor templates bearing the G64S high-fidelity polymerase mutation in the absence (black bars) or presence of 600 $\mu$ M ribavirin (grey bars). Recombinant viruses were quantified by plaque assay and the results are expressed normalized to the yield of the same assay in the absence of ribavirin, with error bars indicating the standard deviation of three or more independent assays.



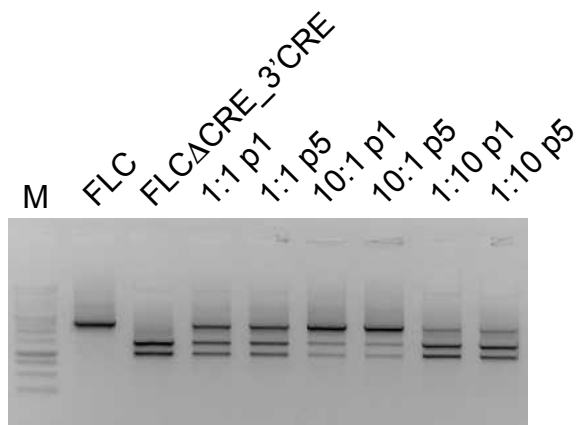

Woodman *et al.*, Supplementary Figure 2

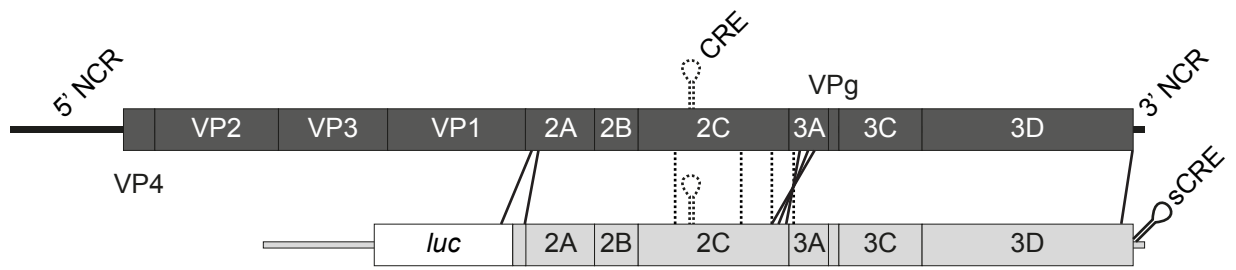

Woodman et al., Supplementary Figure S3

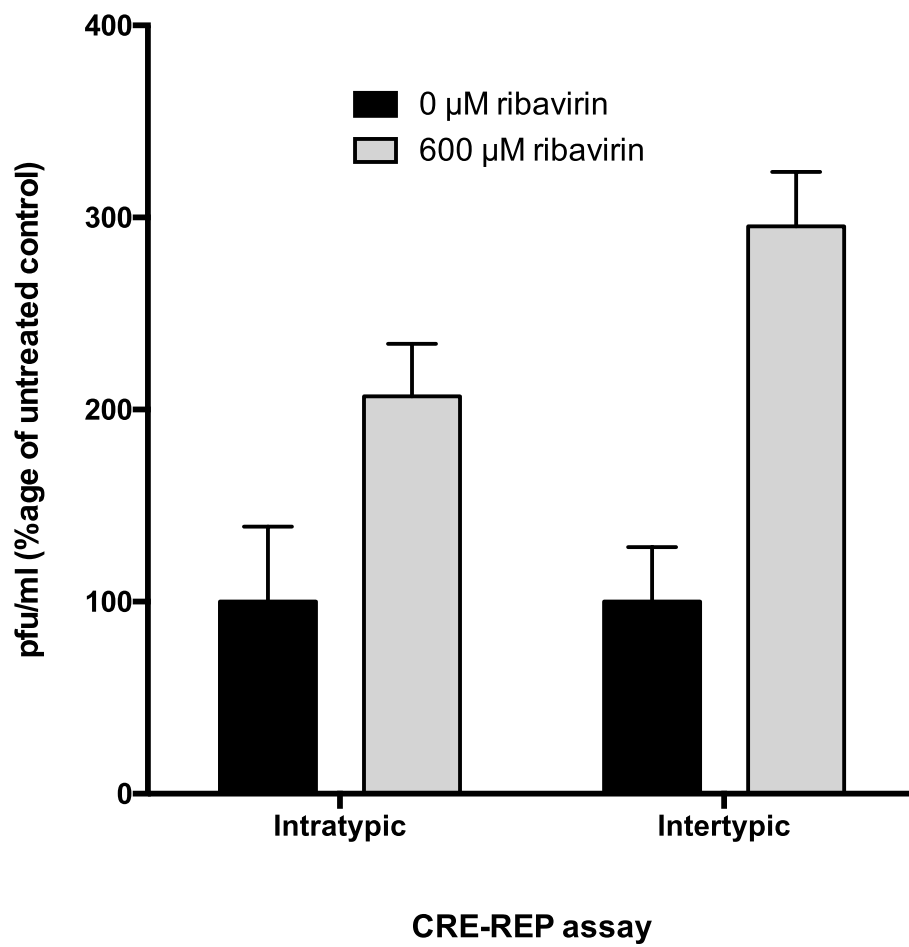

Woodman *et al.*, Figure S4

Supplementary Table T1 – primers used in this study

| Mutagenic primer | Sequence                                   |
|------------------|--------------------------------------------|
| PV1-G64S-F       | CTCCAAGTACGTGTCTAACAAAATTACTGAAGTGGATGAG   |
| PV1-G64S-R       | CTCATCCACTTCAGTAATTTTGTAGACACGTAAGTGGAG    |
| PV1-K359R-F      | CTAACTATGACTCCAGCTGACCGATCAGCTACATTTG      |
| PV1-K359R-R      | CAAATGTAGCTGATCGGTCAGCTGGAGTCATAGTTA       |
| PV3-G64S-F       | CAATCTTCTCTAAGTATGTATCGAACAAGATCACTGAGGTGG |
| PV3-G64S-R       | CCACCTCAGTGATCTTGTTCGATACATACTTAGAGAAGATTG |
| PV3-K359R-F      | CATGACTCCGGCAGATAGGTCTGCCACTTTTGAGAC       |
| PV3-K359R-R      | GTCTCAAAAGTGGCAGACCTATCTGCCGGAGTCATG       |
| CRE_MUT-F        | CAACTATATCCAATTTAAATCCAAACACCGTATCGAACCAG  |
| CRE_MUT-R        | CTGGTTCGATACGGTGTGGATTAAATTGGATATAGTTG     |
| BSSHII-F         | CATTTTAGGCGCGCTAACCCCTACCTCAGTCGAATTGG     |
| BSSHII-R         | GGTTAGCGCGCCTAAAAATGAGTCAAGCCAACGGCGGTAC   |
| SYNTH_CRE-F      | CGCGCCCGGGTAAGAGCAAACACCGTATTACCCGGG       |
| SYNTH_CRE_R      | CGCGCCCGGGTAATACGGTGTGGCTCTTACCCGGG        |
| PV1 H273R - FWD  | CTAAACCACTCACACAGGCTGTACAAGAATAAAACA       |
| PV1 H273R - REV  | TGTTTTATTCTTGTACAGCCTGTGTGAGTGGTTTAG       |
| PV3 H273R - FWD  | CTTAACCATTCACACAGGTGTTACAAAACAAG           |
| PV3 H273R - REV  | CTTGTTTTTGTAAACACCTGTGTGAATGGTTAAG         |
